# Supplementary material for: Sources of Pre-Analytical Variations in Yield of DNA Extracted from Blood Samples: Analysis of 50,000 DNA Samples in EPIC
Source: PubMed Central journal article supplement (PMC3396633; doi:10.1371/journal.pone.0039821), 2012-07-13
Supplement: pone.0039821.s001.pdf [file pone.0039821.s001.pdf]

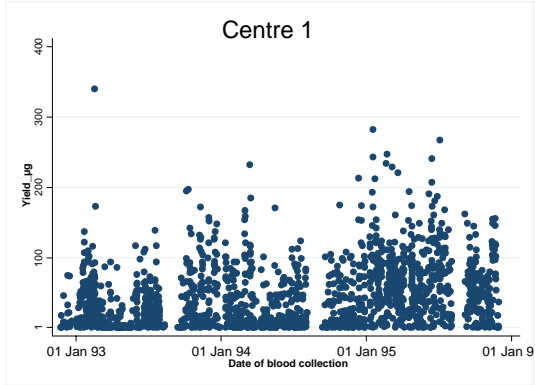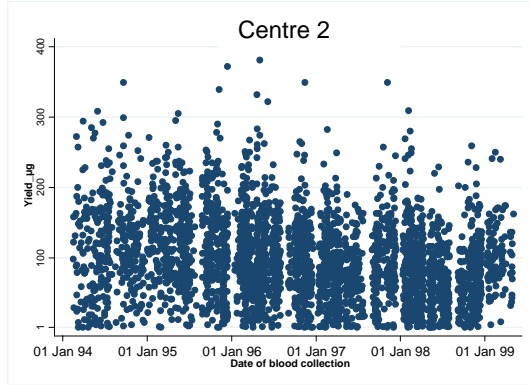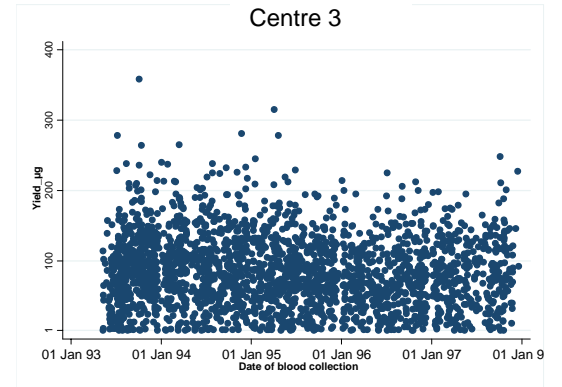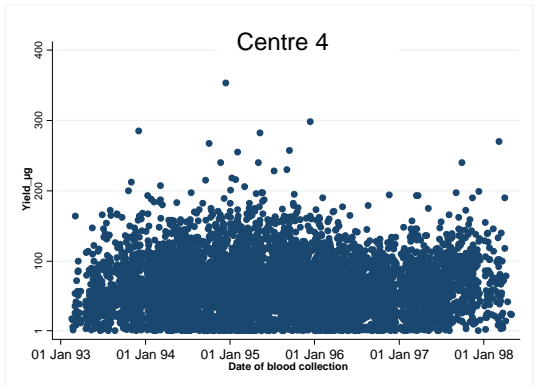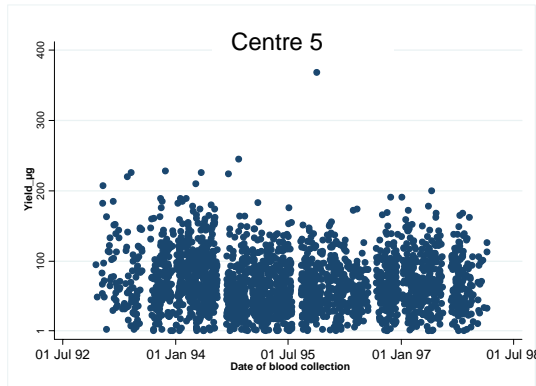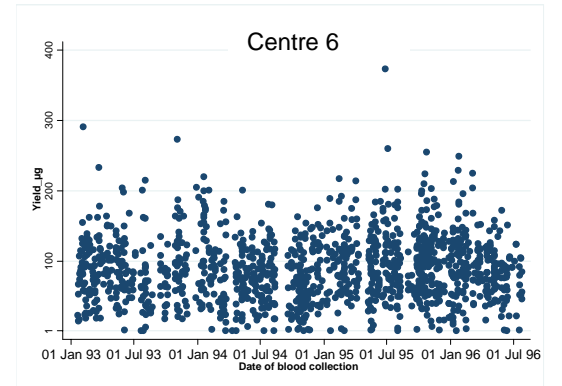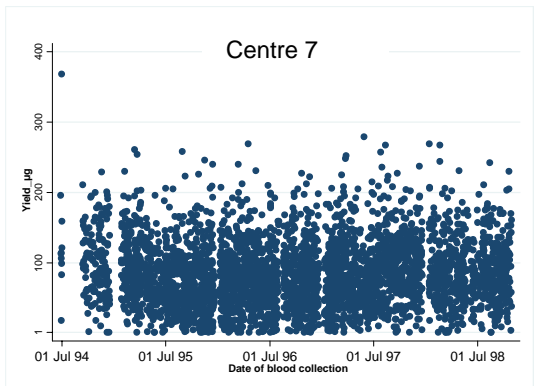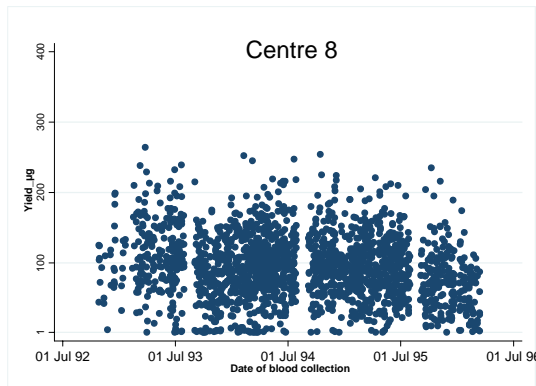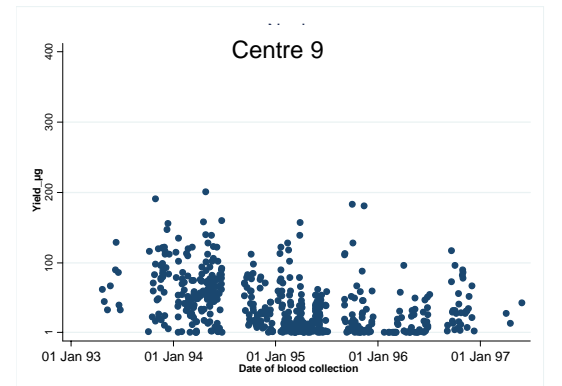

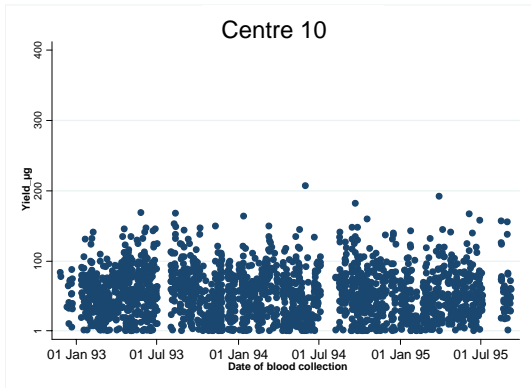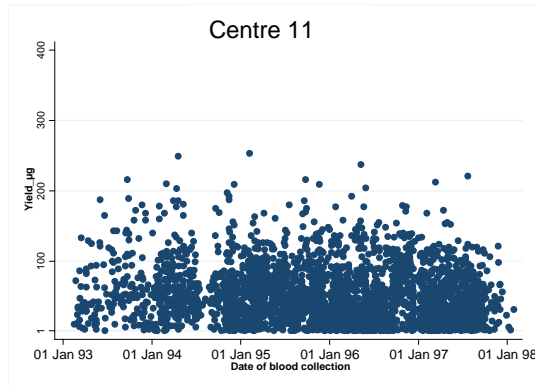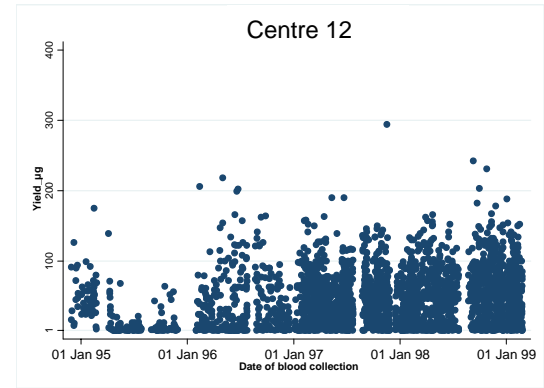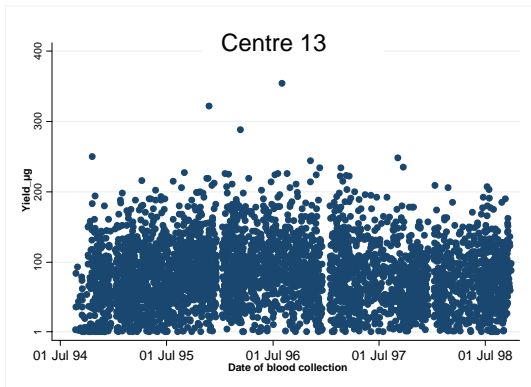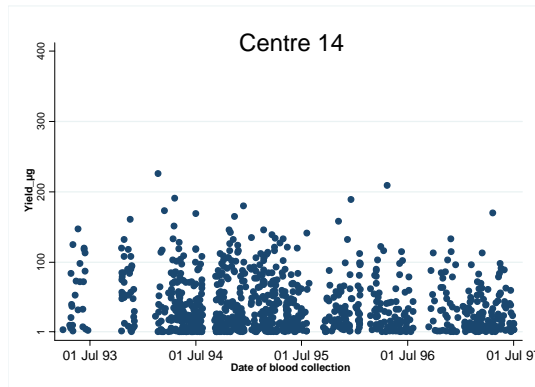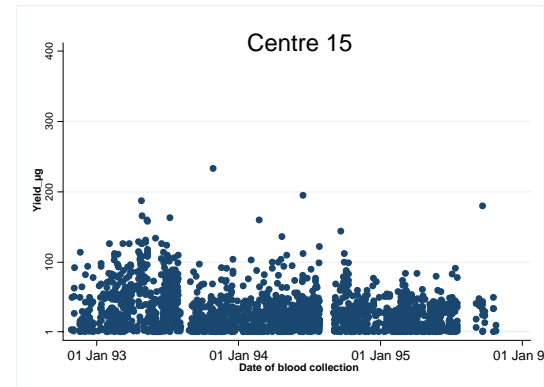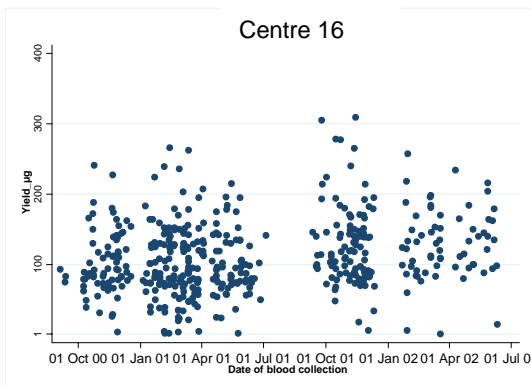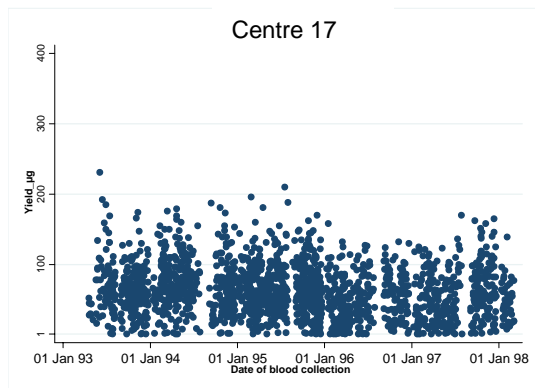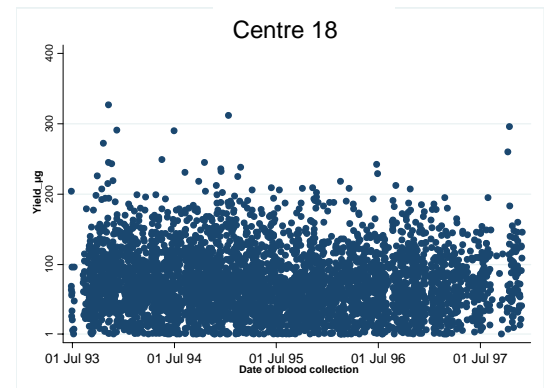

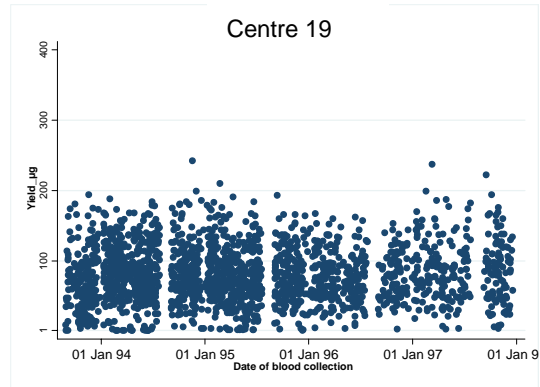

Figure S1: Temporal variations in DNA yield in several centers
